# Supplementary material for: Proteomic Profiling in Drosophila Reveals Potential Dube3a Regulation of the Actin Cytoskeleton and Neuronal Homeostasis
Source: PubMed Central journal article supplement (PMC3633955; doi:10.1371/journal.pone.0061952), 2013-04-23
Supplement: pone.0061952.s001.pdf [file pone.0061952.s001.pdf]

Supplemental Table 1

| Gene Name              | Extract | MW      | pH   | Fc      | Fc in                        | Slide # in File | Band # in slide | CG number | FBgn number |          |    |        |      |        |           |   |    |        |             |    |        |      |        |                              |   |    |    |        |      |       |            |   |   |    |        |      |       |            |   |   |    |         |      |       |           |   |    |                       |    |        |      |       |           |   |    |        |             |    |        |      |       |                              |    |    |    |        |      |       |           |   |    |    |        |      |       |                              |    |    |                        |    |        |      |       |            |   |    |        |             |    |        |      |       |               |   |    |    |        |      |       |                              |    |   |          |    |        |      |        |               |   |    |        |             |    |        |      |        |           |   |    |    |        |      |       |           |   |    |    |        |      |       |                              |   |    |    |        |      |       |               |   |    |               |    |        |      |      |            |   |    |        |             |                 |    |        |      |        |               |   |    |         |             |    |         |      |       |           |   |    |    |        |      |         |               |   |    |                 |    |        |      |         |           |   |    |         |             |    |        |      |        |           |   |    |    |        |      |        |           |   |    |    |        |      |       |           |   |    |    |        |      |       |                              |    |   |    |        |      |       |               |   |    |    |        |      |       |                              |    |    |    |        |      |       |           |   |   |    |        |      |       |               |   |   |    |        |      |       |           |   |   |                |    |        |     |       |            |   |
|------------------------|---------|---------|------|---------|------------------------------|-----------------|-----------------|-----------|-------------|----------|----|--------|------|--------|-----------|---|----|--------|-------------|----|--------|------|--------|------------------------------|---|----|----|--------|------|-------|------------|---|---|----|--------|------|-------|------------|---|---|----|---------|------|-------|-----------|---|----|-----------------------|----|--------|------|-------|-----------|---|----|--------|-------------|----|--------|------|-------|------------------------------|----|----|----|--------|------|-------|-----------|---|----|----|--------|------|-------|------------------------------|----|----|------------------------|----|--------|------|-------|------------|---|----|--------|-------------|----|--------|------|-------|---------------|---|----|----|--------|------|-------|------------------------------|----|---|----------|----|--------|------|--------|---------------|---|----|--------|-------------|----|--------|------|--------|-----------|---|----|----|--------|------|-------|-----------|---|----|----|--------|------|-------|------------------------------|---|----|----|--------|------|-------|---------------|---|----|---------------|----|--------|------|------|------------|---|----|--------|-------------|-----------------|----|--------|------|--------|---------------|---|----|---------|-------------|----|---------|------|-------|-----------|---|----|----|--------|------|---------|---------------|---|----|-----------------|----|--------|------|---------|-----------|---|----|---------|-------------|----|--------|------|--------|-----------|---|----|----|--------|------|--------|-----------|---|----|----|--------|------|-------|-----------|---|----|----|--------|------|-------|------------------------------|----|---|----|--------|------|-------|---------------|---|----|----|--------|------|-------|------------------------------|----|----|----|--------|------|-------|-----------|---|---|----|--------|------|-------|---------------|---|---|----|--------|------|-------|-----------|---|---|----------------|----|--------|-----|-------|------------|---|
| Actin 57B              | CE      | 27.750  | 6.23 | +2.51   | HS>Dube3a-C/A                | 2               | 5               | CG10067   | FBgn0000044 |          |    |        |      |        |           |   |    |        |             |    |        |      |        |                              |   |    |    |        |      |       |            |   |   |    |        |      |       |            |   |   |    |         |      |       |           |   |    |                       |    |        |      |       |           |   |    |        |             |    |        |      |       |                              |    |    |    |        |      |       |           |   |    |    |        |      |       |                              |    |    |                        |    |        |      |       |            |   |    |        |             |    |        |      |       |               |   |    |    |        |      |       |                              |    |   |          |    |        |      |        |               |   |    |        |             |    |        |      |        |           |   |    |    |        |      |       |           |   |    |    |        |      |       |                              |   |    |    |        |      |       |               |   |    |               |    |        |      |      |            |   |    |        |             |                 |    |        |      |        |               |   |    |         |             |    |         |      |       |           |   |    |    |        |      |         |               |   |    |                 |    |        |      |         |           |   |    |         |             |    |        |      |        |           |   |    |    |        |      |        |           |   |    |    |        |      |       |           |   |    |    |        |      |       |                              |    |   |    |        |      |       |               |   |    |    |        |      |       |                              |    |    |    |        |      |       |           |   |   |    |        |      |       |               |   |   |    |        |      |       |           |   |   |                |    |        |     |       |            |   |
|                        | CE      | 40.150  | 6.35 | +2.05   | HS>Dube3a                    | 3               | 7               |           |             | Actin-5c | ME | 59.742 | 7.78 | +66.37 | HS>Dube3a | 7 | 24 | CG4027 | FBgn0000042 | ME | 60.949 | 7.78 | +27.17 | <i>Dube3a</i> <sup>15b</sup> | 9 | 28 | CE | 41.736 | 5.46 | +4.32 | hUBE3a-77L | 1 | 5 | CE | 41.457 | 5.86 | +2.28 | hUBE3a-77L | 1 | 6 | ME | 163.810 | 7.12 | -3.86 | HS>Dube3a | 7 | 10 | Alcohol Dehydrogenase | CE | 26.830 | 7.12 | +4.35 | HS>Dube3a | 3 | 19 | CG3481 | FBgn0000055 | ME | 68.987 | 7.18 | -2.87 | <i>Dube3a</i> <sup>15b</sup> | 10 | 17 | ME | 25.458 | 7.46 | -3.84 | HS>Dube3a | 7 | 23 | ME | 38.859 | 7.12 | -6.22 | <i>Dube3a</i> <sup>15b</sup> | 10 | 16 | Aldehyde Dehydrogenase | CE | 52.887 | 6.22 | +6.64 | hUBE3a-77L | 1 | 11 | CG3752 | FBgn0012036 | CE | 40.675 | 6.83 | +4.92 | HS>Dube3a-C/A | 2 | 13 | ME | 50.620 | 6.12 | +3.19 | <i>Dube3a</i> <sup>15b</sup> | 10 | 8 | Aldolase | CE | 37.452 | 7.78 | +34.48 | HS>Dube3a-C/A | 2 | 23 | CG6058 | FBgn0000064 | CE | 40.260 | 7.12 | +24.84 | HS>Dube3a | 3 | 16 | CE | 29.340 | 7.67 | +2.04 | HS>Dube3a | 3 | 25 | ME | 39.436 | 7.46 | -3.05 | <i>Dube3a</i> <sup>15b</sup> | 9 | 25 | ME | 27.382 | 7.12 | -7.71 | HS>Dube3a-C/A | 8 | 16 | Alpha-Tubulin | CE | 51.910 | 6.22 | 4.17 | hUBE3a-77L | 1 | 12 | CG1913 | FBgn0003884 | Apolipoporphins | ME | 61.646 | 8.38 | +33.05 | HS>Dube3a-C/A | 8 | 28 | CG11064 | FBgn0087002 | CE | 228.690 | 7.41 | +5.88 | HS>Dube3a | 3 | 21 | CE | 60.511 | 8.55 | -390.23 | HS>Dube3a-C/A | 2 | 25 | Arginine Kinase | CE | 38.580 | 7.12 | +110.12 | HS>Dube3a | 3 | 17 | CG32031 | FBgn0000116 | CE | 37.530 | 6.76 | +32.52 | HS>Dube3a | 3 | 10 | CE | 36.730 | 7.12 | +10.01 | HS>Dube3a | 3 | 18 | NE | 38.387 | 6.84 | +2.46 | HS>Dube3a | 6 | 12 | ME | 38.051 | 6.33 | -2.72 | <i>Dube3a</i> <sup>15b</sup> | 10 | 4 | ME | 38.204 | 6.69 | -3.87 | HS>Dube3a-C/A | 8 | 10 | ME | 37.260 | 6.69 | -4.31 | <i>Dube3a</i> <sup>15b</sup> | 10 | 10 | ME | 37.510 | 6.69 | -5.85 | HS>Dube3a | 7 | 7 | CE | 24.390 | 6.53 | -6.66 | HS>Dube3a-C/A | 2 | 6 | CE | 37.440 | 6.53 | -8.11 | HS>Dube3a | 3 | 4 | ATP synthase-β | CE | 52.890 | 4.8 | +3.97 | hUBE3a-77L | 1 |
| Actin-5c               | ME      | 59.742  | 7.78 | +66.37  | HS>Dube3a                    | 7               | 24              | CG4027    | FBgn0000042 |          |    |        |      |        |           |   |    |        |             |    |        |      |        |                              |   |    |    |        |      |       |            |   |   |    |        |      |       |            |   |   |    |         |      |       |           |   |    |                       |    |        |      |       |           |   |    |        |             |    |        |      |       |                              |    |    |    |        |      |       |           |   |    |    |        |      |       |                              |    |    |                        |    |        |      |       |            |   |    |        |             |    |        |      |       |               |   |    |    |        |      |       |                              |    |   |          |    |        |      |        |               |   |    |        |             |    |        |      |        |           |   |    |    |        |      |       |           |   |    |    |        |      |       |                              |   |    |    |        |      |       |               |   |    |               |    |        |      |      |            |   |    |        |             |                 |    |        |      |        |               |   |    |         |             |    |         |      |       |           |   |    |    |        |      |         |               |   |    |                 |    |        |      |         |           |   |    |         |             |    |        |      |        |           |   |    |    |        |      |        |           |   |    |    |        |      |       |           |   |    |    |        |      |       |                              |    |   |    |        |      |       |               |   |    |    |        |      |       |                              |    |    |    |        |      |       |           |   |   |    |        |      |       |               |   |   |    |        |      |       |           |   |   |                |    |        |     |       |            |   |
|                        | ME      | 60.949  | 7.78 | +27.17  | <i>Dube3a</i> <sup>15b</sup> | 9               | 28              |           |             |          |    |        |      |        |           |   |    |        |             |    |        |      |        |                              |   |    |    |        |      |       |            |   |   |    |        |      |       |            |   |   |    |         |      |       |           |   |    |                       |    |        |      |       |           |   |    |        |             |    |        |      |       |                              |    |    |    |        |      |       |           |   |    |    |        |      |       |                              |    |    |                        |    |        |      |       |            |   |    |        |             |    |        |      |       |               |   |    |    |        |      |       |                              |    |   |          |    |        |      |        |               |   |    |        |             |    |        |      |        |           |   |    |    |        |      |       |           |   |    |    |        |      |       |                              |   |    |    |        |      |       |               |   |    |               |    |        |      |      |            |   |    |        |             |                 |    |        |      |        |               |   |    |         |             |    |         |      |       |           |   |    |    |        |      |         |               |   |    |                 |    |        |      |         |           |   |    |         |             |    |        |      |        |           |   |    |    |        |      |        |           |   |    |    |        |      |       |           |   |    |    |        |      |       |                              |    |   |    |        |      |       |               |   |    |    |        |      |       |                              |    |    |    |        |      |       |           |   |   |    |        |      |       |               |   |   |    |        |      |       |           |   |   |                |    |        |     |       |            |   |
|                        | CE      | 41.736  | 5.46 | +4.32   | hUBE3a-77L                   | 1               | 5               |           |             |          |    |        |      |        |           |   |    |        |             |    |        |      |        |                              |   |    |    |        |      |       |            |   |   |    |        |      |       |            |   |   |    |         |      |       |           |   |    |                       |    |        |      |       |           |   |    |        |             |    |        |      |       |                              |    |    |    |        |      |       |           |   |    |    |        |      |       |                              |    |    |                        |    |        |      |       |            |   |    |        |             |    |        |      |       |               |   |    |    |        |      |       |                              |    |   |          |    |        |      |        |               |   |    |        |             |    |        |      |        |           |   |    |    |        |      |       |           |   |    |    |        |      |       |                              |   |    |    |        |      |       |               |   |    |               |    |        |      |      |            |   |    |        |             |                 |    |        |      |        |               |   |    |         |             |    |         |      |       |           |   |    |    |        |      |         |               |   |    |                 |    |        |      |         |           |   |    |         |             |    |        |      |        |           |   |    |    |        |      |        |           |   |    |    |        |      |       |           |   |    |    |        |      |       |                              |    |   |    |        |      |       |               |   |    |    |        |      |       |                              |    |    |    |        |      |       |           |   |   |    |        |      |       |               |   |   |    |        |      |       |           |   |   |                |    |        |     |       |            |   |
|                        | CE      | 41.457  | 5.86 | +2.28   | hUBE3a-77L                   | 1               | 6               |           |             |          |    |        |      |        |           |   |    |        |             |    |        |      |        |                              |   |    |    |        |      |       |            |   |   |    |        |      |       |            |   |   |    |         |      |       |           |   |    |                       |    |        |      |       |           |   |    |        |             |    |        |      |       |                              |    |    |    |        |      |       |           |   |    |    |        |      |       |                              |    |    |                        |    |        |      |       |            |   |    |        |             |    |        |      |       |               |   |    |    |        |      |       |                              |    |   |          |    |        |      |        |               |   |    |        |             |    |        |      |        |           |   |    |    |        |      |       |           |   |    |    |        |      |       |                              |   |    |    |        |      |       |               |   |    |               |    |        |      |      |            |   |    |        |             |                 |    |        |      |        |               |   |    |         |             |    |         |      |       |           |   |    |    |        |      |         |               |   |    |                 |    |        |      |         |           |   |    |         |             |    |        |      |        |           |   |    |    |        |      |        |           |   |    |    |        |      |       |           |   |    |    |        |      |       |                              |    |   |    |        |      |       |               |   |    |    |        |      |       |                              |    |    |    |        |      |       |           |   |   |    |        |      |       |               |   |   |    |        |      |       |           |   |   |                |    |        |     |       |            |   |
|                        | ME      | 163.810 | 7.12 | -3.86   | HS>Dube3a                    | 7               | 10              |           |             |          |    |        |      |        |           |   |    |        |             |    |        |      |        |                              |   |    |    |        |      |       |            |   |   |    |        |      |       |            |   |   |    |         |      |       |           |   |    |                       |    |        |      |       |           |   |    |        |             |    |        |      |       |                              |    |    |    |        |      |       |           |   |    |    |        |      |       |                              |    |    |                        |    |        |      |       |            |   |    |        |             |    |        |      |       |               |   |    |    |        |      |       |                              |    |   |          |    |        |      |        |               |   |    |        |             |    |        |      |        |           |   |    |    |        |      |       |           |   |    |    |        |      |       |                              |   |    |    |        |      |       |               |   |    |               |    |        |      |      |            |   |    |        |             |                 |    |        |      |        |               |   |    |         |             |    |         |      |       |           |   |    |    |        |      |         |               |   |    |                 |    |        |      |         |           |   |    |         |             |    |        |      |        |           |   |    |    |        |      |        |           |   |    |    |        |      |       |           |   |    |    |        |      |       |                              |    |   |    |        |      |       |               |   |    |    |        |      |       |                              |    |    |    |        |      |       |           |   |   |    |        |      |       |               |   |   |    |        |      |       |           |   |   |                |    |        |     |       |            |   |
| Alcohol Dehydrogenase  | CE      | 26.830  | 7.12 | +4.35   | HS>Dube3a                    | 3               | 19              | CG3481    | FBgn0000055 |          |    |        |      |        |           |   |    |        |             |    |        |      |        |                              |   |    |    |        |      |       |            |   |   |    |        |      |       |            |   |   |    |         |      |       |           |   |    |                       |    |        |      |       |           |   |    |        |             |    |        |      |       |                              |    |    |    |        |      |       |           |   |    |    |        |      |       |                              |    |    |                        |    |        |      |       |            |   |    |        |             |    |        |      |       |               |   |    |    |        |      |       |                              |    |   |          |    |        |      |        |               |   |    |        |             |    |        |      |        |           |   |    |    |        |      |       |           |   |    |    |        |      |       |                              |   |    |    |        |      |       |               |   |    |               |    |        |      |      |            |   |    |        |             |                 |    |        |      |        |               |   |    |         |             |    |         |      |       |           |   |    |    |        |      |         |               |   |    |                 |    |        |      |         |           |   |    |         |             |    |        |      |        |           |   |    |    |        |      |        |           |   |    |    |        |      |       |           |   |    |    |        |      |       |                              |    |   |    |        |      |       |               |   |    |    |        |      |       |                              |    |    |    |        |      |       |           |   |   |    |        |      |       |               |   |   |    |        |      |       |           |   |   |                |    |        |     |       |            |   |
|                        | ME      | 68.987  | 7.18 | -2.87   | <i>Dube3a</i> <sup>15b</sup> | 10              | 17              |           |             |          |    |        |      |        |           |   |    |        |             |    |        |      |        |                              |   |    |    |        |      |       |            |   |   |    |        |      |       |            |   |   |    |         |      |       |           |   |    |                       |    |        |      |       |           |   |    |        |             |    |        |      |       |                              |    |    |    |        |      |       |           |   |    |    |        |      |       |                              |    |    |                        |    |        |      |       |            |   |    |        |             |    |        |      |       |               |   |    |    |        |      |       |                              |    |   |          |    |        |      |        |               |   |    |        |             |    |        |      |        |           |   |    |    |        |      |       |           |   |    |    |        |      |       |                              |   |    |    |        |      |       |               |   |    |               |    |        |      |      |            |   |    |        |             |                 |    |        |      |        |               |   |    |         |             |    |         |      |       |           |   |    |    |        |      |         |               |   |    |                 |    |        |      |         |           |   |    |         |             |    |        |      |        |           |   |    |    |        |      |        |           |   |    |    |        |      |       |           |   |    |    |        |      |       |                              |    |   |    |        |      |       |               |   |    |    |        |      |       |                              |    |    |    |        |      |       |           |   |   |    |        |      |       |               |   |   |    |        |      |       |           |   |   |                |    |        |     |       |            |   |
|                        | ME      | 25.458  | 7.46 | -3.84   | HS>Dube3a                    | 7               | 23              |           |             |          |    |        |      |        |           |   |    |        |             |    |        |      |        |                              |   |    |    |        |      |       |            |   |   |    |        |      |       |            |   |   |    |         |      |       |           |   |    |                       |    |        |      |       |           |   |    |        |             |    |        |      |       |                              |    |    |    |        |      |       |           |   |    |    |        |      |       |                              |    |    |                        |    |        |      |       |            |   |    |        |             |    |        |      |       |               |   |    |    |        |      |       |                              |    |   |          |    |        |      |        |               |   |    |        |             |    |        |      |        |           |   |    |    |        |      |       |           |   |    |    |        |      |       |                              |   |    |    |        |      |       |               |   |    |               |    |        |      |      |            |   |    |        |             |                 |    |        |      |        |               |   |    |         |             |    |         |      |       |           |   |    |    |        |      |         |               |   |    |                 |    |        |      |         |           |   |    |         |             |    |        |      |        |           |   |    |    |        |      |        |           |   |    |    |        |      |       |           |   |    |    |        |      |       |                              |    |   |    |        |      |       |               |   |    |    |        |      |       |                              |    |    |    |        |      |       |           |   |   |    |        |      |       |               |   |   |    |        |      |       |           |   |   |                |    |        |     |       |            |   |
|                        | ME      | 38.859  | 7.12 | -6.22   | <i>Dube3a</i> <sup>15b</sup> | 10              | 16              |           |             |          |    |        |      |        |           |   |    |        |             |    |        |      |        |                              |   |    |    |        |      |       |            |   |   |    |        |      |       |            |   |   |    |         |      |       |           |   |    |                       |    |        |      |       |           |   |    |        |             |    |        |      |       |                              |    |    |    |        |      |       |           |   |    |    |        |      |       |                              |    |    |                        |    |        |      |       |            |   |    |        |             |    |        |      |       |               |   |    |    |        |      |       |                              |    |   |          |    |        |      |        |               |   |    |        |             |    |        |      |        |           |   |    |    |        |      |       |           |   |    |    |        |      |       |                              |   |    |    |        |      |       |               |   |    |               |    |        |      |      |            |   |    |        |             |                 |    |        |      |        |               |   |    |         |             |    |         |      |       |           |   |    |    |        |      |         |               |   |    |                 |    |        |      |         |           |   |    |         |             |    |        |      |        |           |   |    |    |        |      |        |           |   |    |    |        |      |       |           |   |    |    |        |      |       |                              |    |   |    |        |      |       |               |   |    |    |        |      |       |                              |    |    |    |        |      |       |           |   |   |    |        |      |       |               |   |   |    |        |      |       |           |   |   |                |    |        |     |       |            |   |
| Aldehyde Dehydrogenase | CE      | 52.887  | 6.22 | +6.64   | hUBE3a-77L                   | 1               | 11              | CG3752    | FBgn0012036 |          |    |        |      |        |           |   |    |        |             |    |        |      |        |                              |   |    |    |        |      |       |            |   |   |    |        |      |       |            |   |   |    |         |      |       |           |   |    |                       |    |        |      |       |           |   |    |        |             |    |        |      |       |                              |    |    |    |        |      |       |           |   |    |    |        |      |       |                              |    |    |                        |    |        |      |       |            |   |    |        |             |    |        |      |       |               |   |    |    |        |      |       |                              |    |   |          |    |        |      |        |               |   |    |        |             |    |        |      |        |           |   |    |    |        |      |       |           |   |    |    |        |      |       |                              |   |    |    |        |      |       |               |   |    |               |    |        |      |      |            |   |    |        |             |                 |    |        |      |        |               |   |    |         |             |    |         |      |       |           |   |    |    |        |      |         |               |   |    |                 |    |        |      |         |           |   |    |         |             |    |        |      |        |           |   |    |    |        |      |        |           |   |    |    |        |      |       |           |   |    |    |        |      |       |                              |    |   |    |        |      |       |               |   |    |    |        |      |       |                              |    |    |    |        |      |       |           |   |   |    |        |      |       |               |   |   |    |        |      |       |           |   |   |                |    |        |     |       |            |   |
|                        | CE      | 40.675  | 6.83 | +4.92   | HS>Dube3a-C/A                | 2               | 13              |           |             |          |    |        |      |        |           |   |    |        |             |    |        |      |        |                              |   |    |    |        |      |       |            |   |   |    |        |      |       |            |   |   |    |         |      |       |           |   |    |                       |    |        |      |       |           |   |    |        |             |    |        |      |       |                              |    |    |    |        |      |       |           |   |    |    |        |      |       |                              |    |    |                        |    |        |      |       |            |   |    |        |             |    |        |      |       |               |   |    |    |        |      |       |                              |    |   |          |    |        |      |        |               |   |    |        |             |    |        |      |        |           |   |    |    |        |      |       |           |   |    |    |        |      |       |                              |   |    |    |        |      |       |               |   |    |               |    |        |      |      |            |   |    |        |             |                 |    |        |      |        |               |   |    |         |             |    |         |      |       |           |   |    |    |        |      |         |               |   |    |                 |    |        |      |         |           |   |    |         |             |    |        |      |        |           |   |    |    |        |      |        |           |   |    |    |        |      |       |           |   |    |    |        |      |       |                              |    |   |    |        |      |       |               |   |    |    |        |      |       |                              |    |    |    |        |      |       |           |   |   |    |        |      |       |               |   |   |    |        |      |       |           |   |   |                |    |        |     |       |            |   |
|                        | ME      | 50.620  | 6.12 | +3.19   | <i>Dube3a</i> <sup>15b</sup> | 10              | 8               |           |             |          |    |        |      |        |           |   |    |        |             |    |        |      |        |                              |   |    |    |        |      |       |            |   |   |    |        |      |       |            |   |   |    |         |      |       |           |   |    |                       |    |        |      |       |           |   |    |        |             |    |        |      |       |                              |    |    |    |        |      |       |           |   |    |    |        |      |       |                              |    |    |                        |    |        |      |       |            |   |    |        |             |    |        |      |       |               |   |    |    |        |      |       |                              |    |   |          |    |        |      |        |               |   |    |        |             |    |        |      |        |           |   |    |    |        |      |       |           |   |    |    |        |      |       |                              |   |    |    |        |      |       |               |   |    |               |    |        |      |      |            |   |    |        |             |                 |    |        |      |        |               |   |    |         |             |    |         |      |       |           |   |    |    |        |      |         |               |   |    |                 |    |        |      |         |           |   |    |         |             |    |        |      |        |           |   |    |    |        |      |        |           |   |    |    |        |      |       |           |   |    |    |        |      |       |                              |    |   |    |        |      |       |               |   |    |    |        |      |       |                              |    |    |    |        |      |       |           |   |   |    |        |      |       |               |   |   |    |        |      |       |           |   |   |                |    |        |     |       |            |   |
| Aldolase               | CE      | 37.452  | 7.78 | +34.48  | HS>Dube3a-C/A                | 2               | 23              | CG6058    | FBgn0000064 |          |    |        |      |        |           |   |    |        |             |    |        |      |        |                              |   |    |    |        |      |       |            |   |   |    |        |      |       |            |   |   |    |         |      |       |           |   |    |                       |    |        |      |       |           |   |    |        |             |    |        |      |       |                              |    |    |    |        |      |       |           |   |    |    |        |      |       |                              |    |    |                        |    |        |      |       |            |   |    |        |             |    |        |      |       |               |   |    |    |        |      |       |                              |    |   |          |    |        |      |        |               |   |    |        |             |    |        |      |        |           |   |    |    |        |      |       |           |   |    |    |        |      |       |                              |   |    |    |        |      |       |               |   |    |               |    |        |      |      |            |   |    |        |             |                 |    |        |      |        |               |   |    |         |             |    |         |      |       |           |   |    |    |        |      |         |               |   |    |                 |    |        |      |         |           |   |    |         |             |    |        |      |        |           |   |    |    |        |      |        |           |   |    |    |        |      |       |           |   |    |    |        |      |       |                              |    |   |    |        |      |       |               |   |    |    |        |      |       |                              |    |    |    |        |      |       |           |   |   |    |        |      |       |               |   |   |    |        |      |       |           |   |   |                |    |        |     |       |            |   |
|                        | CE      | 40.260  | 7.12 | +24.84  | HS>Dube3a                    | 3               | 16              |           |             |          |    |        |      |        |           |   |    |        |             |    |        |      |        |                              |   |    |    |        |      |       |            |   |   |    |        |      |       |            |   |   |    |         |      |       |           |   |    |                       |    |        |      |       |           |   |    |        |             |    |        |      |       |                              |    |    |    |        |      |       |           |   |    |    |        |      |       |                              |    |    |                        |    |        |      |       |            |   |    |        |             |    |        |      |       |               |   |    |    |        |      |       |                              |    |   |          |    |        |      |        |               |   |    |        |             |    |        |      |        |           |   |    |    |        |      |       |           |   |    |    |        |      |       |                              |   |    |    |        |      |       |               |   |    |               |    |        |      |      |            |   |    |        |             |                 |    |        |      |        |               |   |    |         |             |    |         |      |       |           |   |    |    |        |      |         |               |   |    |                 |    |        |      |         |           |   |    |         |             |    |        |      |        |           |   |    |    |        |      |        |           |   |    |    |        |      |       |           |   |    |    |        |      |       |                              |    |   |    |        |      |       |               |   |    |    |        |      |       |                              |    |    |    |        |      |       |           |   |   |    |        |      |       |               |   |   |    |        |      |       |           |   |   |                |    |        |     |       |            |   |
|                        | CE      | 29.340  | 7.67 | +2.04   | HS>Dube3a                    | 3               | 25              |           |             |          |    |        |      |        |           |   |    |        |             |    |        |      |        |                              |   |    |    |        |      |       |            |   |   |    |        |      |       |            |   |   |    |         |      |       |           |   |    |                       |    |        |      |       |           |   |    |        |             |    |        |      |       |                              |    |    |    |        |      |       |           |   |    |    |        |      |       |                              |    |    |                        |    |        |      |       |            |   |    |        |             |    |        |      |       |               |   |    |    |        |      |       |                              |    |   |          |    |        |      |        |               |   |    |        |             |    |        |      |        |           |   |    |    |        |      |       |           |   |    |    |        |      |       |                              |   |    |    |        |      |       |               |   |    |               |    |        |      |      |            |   |    |        |             |                 |    |        |      |        |               |   |    |         |             |    |         |      |       |           |   |    |    |        |      |         |               |   |    |                 |    |        |      |         |           |   |    |         |             |    |        |      |        |           |   |    |    |        |      |        |           |   |    |    |        |      |       |           |   |    |    |        |      |       |                              |    |   |    |        |      |       |               |   |    |    |        |      |       |                              |    |    |    |        |      |       |           |   |   |    |        |      |       |               |   |   |    |        |      |       |           |   |   |                |    |        |     |       |            |   |
|                        | ME      | 39.436  | 7.46 | -3.05   | <i>Dube3a</i> <sup>15b</sup> | 9               | 25              |           |             |          |    |        |      |        |           |   |    |        |             |    |        |      |        |                              |   |    |    |        |      |       |            |   |   |    |        |      |       |            |   |   |    |         |      |       |           |   |    |                       |    |        |      |       |           |   |    |        |             |    |        |      |       |                              |    |    |    |        |      |       |           |   |    |    |        |      |       |                              |    |    |                        |    |        |      |       |            |   |    |        |             |    |        |      |       |               |   |    |    |        |      |       |                              |    |   |          |    |        |      |        |               |   |    |        |             |    |        |      |        |           |   |    |    |        |      |       |           |   |    |    |        |      |       |                              |   |    |    |        |      |       |               |   |    |               |    |        |      |      |            |   |    |        |             |                 |    |        |      |        |               |   |    |         |             |    |         |      |       |           |   |    |    |        |      |         |               |   |    |                 |    |        |      |         |           |   |    |         |             |    |        |      |        |           |   |    |    |        |      |        |           |   |    |    |        |      |       |           |   |    |    |        |      |       |                              |    |   |    |        |      |       |               |   |    |    |        |      |       |                              |    |    |    |        |      |       |           |   |   |    |        |      |       |               |   |   |    |        |      |       |           |   |   |                |    |        |     |       |            |   |
|                        | ME      | 27.382  | 7.12 | -7.71   | HS>Dube3a-C/A                | 8               | 16              |           |             |          |    |        |      |        |           |   |    |        |             |    |        |      |        |                              |   |    |    |        |      |       |            |   |   |    |        |      |       |            |   |   |    |         |      |       |           |   |    |                       |    |        |      |       |           |   |    |        |             |    |        |      |       |                              |    |    |    |        |      |       |           |   |    |    |        |      |       |                              |    |    |                        |    |        |      |       |            |   |    |        |             |    |        |      |       |               |   |    |    |        |      |       |                              |    |   |          |    |        |      |        |               |   |    |        |             |    |        |      |        |           |   |    |    |        |      |       |           |   |    |    |        |      |       |                              |   |    |    |        |      |       |               |   |    |               |    |        |      |      |            |   |    |        |             |                 |    |        |      |        |               |   |    |         |             |    |         |      |       |           |   |    |    |        |      |         |               |   |    |                 |    |        |      |         |           |   |    |         |             |    |        |      |        |           |   |    |    |        |      |        |           |   |    |    |        |      |       |           |   |    |    |        |      |       |                              |    |   |    |        |      |       |               |   |    |    |        |      |       |                              |    |    |    |        |      |       |           |   |   |    |        |      |       |               |   |   |    |        |      |       |           |   |   |                |    |        |     |       |            |   |
| Alpha-Tubulin          | CE      | 51.910  | 6.22 | 4.17    | hUBE3a-77L                   | 1               | 12              | CG1913    | FBgn0003884 |          |    |        |      |        |           |   |    |        |             |    |        |      |        |                              |   |    |    |        |      |       |            |   |   |    |        |      |       |            |   |   |    |         |      |       |           |   |    |                       |    |        |      |       |           |   |    |        |             |    |        |      |       |                              |    |    |    |        |      |       |           |   |    |    |        |      |       |                              |    |    |                        |    |        |      |       |            |   |    |        |             |    |        |      |       |               |   |    |    |        |      |       |                              |    |   |          |    |        |      |        |               |   |    |        |             |    |        |      |        |           |   |    |    |        |      |       |           |   |    |    |        |      |       |                              |   |    |    |        |      |       |               |   |    |               |    |        |      |      |            |   |    |        |             |                 |    |        |      |        |               |   |    |         |             |    |         |      |       |           |   |    |    |        |      |         |               |   |    |                 |    |        |      |         |           |   |    |         |             |    |        |      |        |           |   |    |    |        |      |        |           |   |    |    |        |      |       |           |   |    |    |        |      |       |                              |    |   |    |        |      |       |               |   |    |    |        |      |       |                              |    |    |    |        |      |       |           |   |   |    |        |      |       |               |   |   |    |        |      |       |           |   |   |                |    |        |     |       |            |   |
| Apolipoporphins        | ME      | 61.646  | 8.38 | +33.05  | HS>Dube3a-C/A                | 8               | 28              | CG11064   | FBgn0087002 |          |    |        |      |        |           |   |    |        |             |    |        |      |        |                              |   |    |    |        |      |       |            |   |   |    |        |      |       |            |   |   |    |         |      |       |           |   |    |                       |    |        |      |       |           |   |    |        |             |    |        |      |       |                              |    |    |    |        |      |       |           |   |    |    |        |      |       |                              |    |    |                        |    |        |      |       |            |   |    |        |             |    |        |      |       |               |   |    |    |        |      |       |                              |    |   |          |    |        |      |        |               |   |    |        |             |    |        |      |        |           |   |    |    |        |      |       |           |   |    |    |        |      |       |                              |   |    |    |        |      |       |               |   |    |               |    |        |      |      |            |   |    |        |             |                 |    |        |      |        |               |   |    |         |             |    |         |      |       |           |   |    |    |        |      |         |               |   |    |                 |    |        |      |         |           |   |    |         |             |    |        |      |        |           |   |    |    |        |      |        |           |   |    |    |        |      |       |           |   |    |    |        |      |       |                              |    |   |    |        |      |       |               |   |    |    |        |      |       |                              |    |    |    |        |      |       |           |   |   |    |        |      |       |               |   |   |    |        |      |       |           |   |   |                |    |        |     |       |            |   |
|                        | CE      | 228.690 | 7.41 | +5.88   | HS>Dube3a                    | 3               | 21              |           |             |          |    |        |      |        |           |   |    |        |             |    |        |      |        |                              |   |    |    |        |      |       |            |   |   |    |        |      |       |            |   |   |    |         |      |       |           |   |    |                       |    |        |      |       |           |   |    |        |             |    |        |      |       |                              |    |    |    |        |      |       |           |   |    |    |        |      |       |                              |    |    |                        |    |        |      |       |            |   |    |        |             |    |        |      |       |               |   |    |    |        |      |       |                              |    |   |          |    |        |      |        |               |   |    |        |             |    |        |      |        |           |   |    |    |        |      |       |           |   |    |    |        |      |       |                              |   |    |    |        |      |       |               |   |    |               |    |        |      |      |            |   |    |        |             |                 |    |        |      |        |               |   |    |         |             |    |         |      |       |           |   |    |    |        |      |         |               |   |    |                 |    |        |      |         |           |   |    |         |             |    |        |      |        |           |   |    |    |        |      |        |           |   |    |    |        |      |       |           |   |    |    |        |      |       |                              |    |   |    |        |      |       |               |   |    |    |        |      |       |                              |    |    |    |        |      |       |           |   |   |    |        |      |       |               |   |   |    |        |      |       |           |   |   |                |    |        |     |       |            |   |
|                        | CE      | 60.511  | 8.55 | -390.23 | HS>Dube3a-C/A                | 2               | 25              |           |             |          |    |        |      |        |           |   |    |        |             |    |        |      |        |                              |   |    |    |        |      |       |            |   |   |    |        |      |       |            |   |   |    |         |      |       |           |   |    |                       |    |        |      |       |           |   |    |        |             |    |        |      |       |                              |    |    |    |        |      |       |           |   |    |    |        |      |       |                              |    |    |                        |    |        |      |       |            |   |    |        |             |    |        |      |       |               |   |    |    |        |      |       |                              |    |   |          |    |        |      |        |               |   |    |        |             |    |        |      |        |           |   |    |    |        |      |       |           |   |    |    |        |      |       |                              |   |    |    |        |      |       |               |   |    |               |    |        |      |      |            |   |    |        |             |                 |    |        |      |        |               |   |    |         |             |    |         |      |       |           |   |    |    |        |      |         |               |   |    |                 |    |        |      |         |           |   |    |         |             |    |        |      |        |           |   |    |    |        |      |        |           |   |    |    |        |      |       |           |   |    |    |        |      |       |                              |    |   |    |        |      |       |               |   |    |    |        |      |       |                              |    |    |    |        |      |       |           |   |   |    |        |      |       |               |   |   |    |        |      |       |           |   |   |                |    |        |     |       |            |   |
| Arginine Kinase        | CE      | 38.580  | 7.12 | +110.12 | HS>Dube3a                    | 3               | 17              | CG32031   | FBgn0000116 |          |    |        |      |        |           |   |    |        |             |    |        |      |        |                              |   |    |    |        |      |       |            |   |   |    |        |      |       |            |   |   |    |         |      |       |           |   |    |                       |    |        |      |       |           |   |    |        |             |    |        |      |       |                              |    |    |    |        |      |       |           |   |    |    |        |      |       |                              |    |    |                        |    |        |      |       |            |   |    |        |             |    |        |      |       |               |   |    |    |        |      |       |                              |    |   |          |    |        |      |        |               |   |    |        |             |    |        |      |        |           |   |    |    |        |      |       |           |   |    |    |        |      |       |                              |   |    |    |        |      |       |               |   |    |               |    |        |      |      |            |   |    |        |             |                 |    |        |      |        |               |   |    |         |             |    |         |      |       |           |   |    |    |        |      |         |               |   |    |                 |    |        |      |         |           |   |    |         |             |    |        |      |        |           |   |    |    |        |      |        |           |   |    |    |        |      |       |           |   |    |    |        |      |       |                              |    |   |    |        |      |       |               |   |    |    |        |      |       |                              |    |    |    |        |      |       |           |   |   |    |        |      |       |               |   |   |    |        |      |       |           |   |   |                |    |        |     |       |            |   |
|                        | CE      | 37.530  | 6.76 | +32.52  | HS>Dube3a                    | 3               | 10              |           |             |          |    |        |      |        |           |   |    |        |             |    |        |      |        |                              |   |    |    |        |      |       |            |   |   |    |        |      |       |            |   |   |    |         |      |       |           |   |    |                       |    |        |      |       |           |   |    |        |             |    |        |      |       |                              |    |    |    |        |      |       |           |   |    |    |        |      |       |                              |    |    |                        |    |        |      |       |            |   |    |        |             |    |        |      |       |               |   |    |    |        |      |       |                              |    |   |          |    |        |      |        |               |   |    |        |             |    |        |      |        |           |   |    |    |        |      |       |           |   |    |    |        |      |       |                              |   |    |    |        |      |       |               |   |    |               |    |        |      |      |            |   |    |        |             |                 |    |        |      |        |               |   |    |         |             |    |         |      |       |           |   |    |    |        |      |         |               |   |    |                 |    |        |      |         |           |   |    |         |             |    |        |      |        |           |   |    |    |        |      |        |           |   |    |    |        |      |       |           |   |    |    |        |      |       |                              |    |   |    |        |      |       |               |   |    |    |        |      |       |                              |    |    |    |        |      |       |           |   |   |    |        |      |       |               |   |   |    |        |      |       |           |   |   |                |    |        |     |       |            |   |
|                        | CE      | 36.730  | 7.12 | +10.01  | HS>Dube3a                    | 3               | 18              |           |             |          |    |        |      |        |           |   |    |        |             |    |        |      |        |                              |   |    |    |        |      |       |            |   |   |    |        |      |       |            |   |   |    |         |      |       |           |   |    |                       |    |        |      |       |           |   |    |        |             |    |        |      |       |                              |    |    |    |        |      |       |           |   |    |    |        |      |       |                              |    |    |                        |    |        |      |       |            |   |    |        |             |    |        |      |       |               |   |    |    |        |      |       |                              |    |   |          |    |        |      |        |               |   |    |        |             |    |        |      |        |           |   |    |    |        |      |       |           |   |    |    |        |      |       |                              |   |    |    |        |      |       |               |   |    |               |    |        |      |      |            |   |    |        |             |                 |    |        |      |        |               |   |    |         |             |    |         |      |       |           |   |    |    |        |      |         |               |   |    |                 |    |        |      |         |           |   |    |         |             |    |        |      |        |           |   |    |    |        |      |        |           |   |    |    |        |      |       |           |   |    |    |        |      |       |                              |    |   |    |        |      |       |               |   |    |    |        |      |       |                              |    |    |    |        |      |       |           |   |   |    |        |      |       |               |   |   |    |        |      |       |           |   |   |                |    |        |     |       |            |   |
|                        | NE      | 38.387  | 6.84 | +2.46   | HS>Dube3a                    | 6               | 12              |           |             |          |    |        |      |        |           |   |    |        |             |    |        |      |        |                              |   |    |    |        |      |       |            |   |   |    |        |      |       |            |   |   |    |         |      |       |           |   |    |                       |    |        |      |       |           |   |    |        |             |    |        |      |       |                              |    |    |    |        |      |       |           |   |    |    |        |      |       |                              |    |    |                        |    |        |      |       |            |   |    |        |             |    |        |      |       |               |   |    |    |        |      |       |                              |    |   |          |    |        |      |        |               |   |    |        |             |    |        |      |        |           |   |    |    |        |      |       |           |   |    |    |        |      |       |                              |   |    |    |        |      |       |               |   |    |               |    |        |      |      |            |   |    |        |             |                 |    |        |      |        |               |   |    |         |             |    |         |      |       |           |   |    |    |        |      |         |               |   |    |                 |    |        |      |         |           |   |    |         |             |    |        |      |        |           |   |    |    |        |      |        |           |   |    |    |        |      |       |           |   |    |    |        |      |       |                              |    |   |    |        |      |       |               |   |    |    |        |      |       |                              |    |    |    |        |      |       |           |   |   |    |        |      |       |               |   |   |    |        |      |       |           |   |   |                |    |        |     |       |            |   |
|                        | ME      | 38.051  | 6.33 | -2.72   | <i>Dube3a</i> <sup>15b</sup> | 10              | 4               |           |             |          |    |        |      |        |           |   |    |        |             |    |        |      |        |                              |   |    |    |        |      |       |            |   |   |    |        |      |       |            |   |   |    |         |      |       |           |   |    |                       |    |        |      |       |           |   |    |        |             |    |        |      |       |                              |    |    |    |        |      |       |           |   |    |    |        |      |       |                              |    |    |                        |    |        |      |       |            |   |    |        |             |    |        |      |       |               |   |    |    |        |      |       |                              |    |   |          |    |        |      |        |               |   |    |        |             |    |        |      |        |           |   |    |    |        |      |       |           |   |    |    |        |      |       |                              |   |    |    |        |      |       |               |   |    |               |    |        |      |      |            |   |    |        |             |                 |    |        |      |        |               |   |    |         |             |    |         |      |       |           |   |    |    |        |      |         |               |   |    |                 |    |        |      |         |           |   |    |         |             |    |        |      |        |           |   |    |    |        |      |        |           |   |    |    |        |      |       |           |   |    |    |        |      |       |                              |    |   |    |        |      |       |               |   |    |    |        |      |       |                              |    |    |    |        |      |       |           |   |   |    |        |      |       |               |   |   |    |        |      |       |           |   |   |                |    |        |     |       |            |   |
|                        | ME      | 38.204  | 6.69 | -3.87   | HS>Dube3a-C/A                | 8               | 10              |           |             |          |    |        |      |        |           |   |    |        |             |    |        |      |        |                              |   |    |    |        |      |       |            |   |   |    |        |      |       |            |   |   |    |         |      |       |           |   |    |                       |    |        |      |       |           |   |    |        |             |    |        |      |       |                              |    |    |    |        |      |       |           |   |    |    |        |      |       |                              |    |    |                        |    |        |      |       |            |   |    |        |             |    |        |      |       |               |   |    |    |        |      |       |                              |    |   |          |    |        |      |        |               |   |    |        |             |    |        |      |        |           |   |    |    |        |      |       |           |   |    |    |        |      |       |                              |   |    |    |        |      |       |               |   |    |               |    |        |      |      |            |   |    |        |             |                 |    |        |      |        |               |   |    |         |             |    |         |      |       |           |   |    |    |        |      |         |               |   |    |                 |    |        |      |         |           |   |    |         |             |    |        |      |        |           |   |    |    |        |      |        |           |   |    |    |        |      |       |           |   |    |    |        |      |       |                              |    |   |    |        |      |       |               |   |    |    |        |      |       |                              |    |    |    |        |      |       |           |   |   |    |        |      |       |               |   |   |    |        |      |       |           |   |   |                |    |        |     |       |            |   |
|                        | ME      | 37.260  | 6.69 | -4.31   | <i>Dube3a</i> <sup>15b</sup> | 10              | 10              |           |             |          |    |        |      |        |           |   |    |        |             |    |        |      |        |                              |   |    |    |        |      |       |            |   |   |    |        |      |       |            |   |   |    |         |      |       |           |   |    |                       |    |        |      |       |           |   |    |        |             |    |        |      |       |                              |    |    |    |        |      |       |           |   |    |    |        |      |       |                              |    |    |                        |    |        |      |       |            |   |    |        |             |    |        |      |       |               |   |    |    |        |      |       |                              |    |   |          |    |        |      |        |               |   |    |        |             |    |        |      |        |           |   |    |    |        |      |       |           |   |    |    |        |      |       |                              |   |    |    |        |      |       |               |   |    |               |    |        |      |      |            |   |    |        |             |                 |    |        |      |        |               |   |    |         |             |    |         |      |       |           |   |    |    |        |      |         |               |   |    |                 |    |        |      |         |           |   |    |         |             |    |        |      |        |           |   |    |    |        |      |        |           |   |    |    |        |      |       |           |   |    |    |        |      |       |                              |    |   |    |        |      |       |               |   |    |    |        |      |       |                              |    |    |    |        |      |       |           |   |   |    |        |      |       |               |   |   |    |        |      |       |           |   |   |                |    |        |     |       |            |   |
|                        | ME      | 37.510  | 6.69 | -5.85   | HS>Dube3a                    | 7               | 7               |           |             |          |    |        |      |        |           |   |    |        |             |    |        |      |        |                              |   |    |    |        |      |       |            |   |   |    |        |      |       |            |   |   |    |         |      |       |           |   |    |                       |    |        |      |       |           |   |    |        |             |    |        |      |       |                              |    |    |    |        |      |       |           |   |    |    |        |      |       |                              |    |    |                        |    |        |      |       |            |   |    |        |             |    |        |      |       |               |   |    |    |        |      |       |                              |    |   |          |    |        |      |        |               |   |    |        |             |    |        |      |        |           |   |    |    |        |      |       |           |   |    |    |        |      |       |                              |   |    |    |        |      |       |               |   |    |               |    |        |      |      |            |   |    |        |             |                 |    |        |      |        |               |   |    |         |             |    |         |      |       |           |   |    |    |        |      |         |               |   |    |                 |    |        |      |         |           |   |    |         |             |    |        |      |        |           |   |    |    |        |      |        |           |   |    |    |        |      |       |           |   |    |    |        |      |       |                              |    |   |    |        |      |       |               |   |    |    |        |      |       |                              |    |    |    |        |      |       |           |   |   |    |        |      |       |               |   |   |    |        |      |       |           |   |   |                |    |        |     |       |            |   |
|                        | CE      | 24.390  | 6.53 | -6.66   | HS>Dube3a-C/A                | 2               | 6               |           |             |          |    |        |      |        |           |   |    |        |             |    |        |      |        |                              |   |    |    |        |      |       |            |   |   |    |        |      |       |            |   |   |    |         |      |       |           |   |    |                       |    |        |      |       |           |   |    |        |             |    |        |      |       |                              |    |    |    |        |      |       |           |   |    |    |        |      |       |                              |    |    |                        |    |        |      |       |            |   |    |        |             |    |        |      |       |               |   |    |    |        |      |       |                              |    |   |          |    |        |      |        |               |   |    |        |             |    |        |      |        |           |   |    |    |        |      |       |           |   |    |    |        |      |       |                              |   |    |    |        |      |       |               |   |    |               |    |        |      |      |            |   |    |        |             |                 |    |        |      |        |               |   |    |         |             |    |         |      |       |           |   |    |    |        |      |         |               |   |    |                 |    |        |      |         |           |   |    |         |             |    |        |      |        |           |   |    |    |        |      |        |           |   |    |    |        |      |       |           |   |    |    |        |      |       |                              |    |   |    |        |      |       |               |   |    |    |        |      |       |                              |    |    |    |        |      |       |           |   |   |    |        |      |       |               |   |   |    |        |      |       |           |   |   |                |    |        |     |       |            |   |
|                        | CE      | 37.440  | 6.53 | -8.11   | HS>Dube3a                    | 3               | 4               |           |             |          |    |        |      |        |           |   |    |        |             |    |        |      |        |                              |   |    |    |        |      |       |            |   |   |    |        |      |       |            |   |   |    |         |      |       |           |   |    |                       |    |        |      |       |           |   |    |        |             |    |        |      |       |                              |    |    |    |        |      |       |           |   |    |    |        |      |       |                              |    |    |                        |    |        |      |       |            |   |    |        |             |    |        |      |       |               |   |    |    |        |      |       |                              |    |   |          |    |        |      |        |               |   |    |        |             |    |        |      |        |           |   |    |    |        |      |       |           |   |    |    |        |      |       |                              |   |    |    |        |      |       |               |   |    |               |    |        |      |      |            |   |    |        |             |                 |    |        |      |        |               |   |    |         |             |    |         |      |       |           |   |    |    |        |      |         |               |   |    |                 |    |        |      |         |           |   |    |         |             |    |        |      |        |           |   |    |    |        |      |        |           |   |    |    |        |      |       |           |   |    |    |        |      |       |                              |    |   |    |        |      |       |               |   |    |    |        |      |       |                              |    |    |    |        |      |       |           |   |   |    |        |      |       |               |   |   |    |        |      |       |           |   |   |                |    |        |     |       |            |   |
| ATP synthase-β         | CE      | 52.890  | 4.8  | +3.97   | hUBE3a-77L                   | 1               | 1               | CG11154   | FBgn0010217 |          |    |        |      |        |           |   |    |        |             |    |        |      |        |                              |   |    |    |        |      |       |            |   |   |    |        |      |       |            |   |   |    |         |      |       |           |   |    |                       |    |        |      |       |           |   |    |        |             |    |        |      |       |                              |    |    |    |        |      |       |           |   |    |    |        |      |       |                              |    |    |                        |    |        |      |       |            |   |    |        |             |    |        |      |       |               |   |    |    |        |      |       |                              |    |   |          |    |        |      |        |               |   |    |        |             |    |        |      |        |           |   |    |    |        |      |       |           |   |    |    |        |      |       |                              |   |    |    |        |      |       |               |   |    |               |    |        |      |      |            |   |    |        |             |                 |    |        |      |        |               |   |    |         |             |    |         |      |       |           |   |    |    |        |      |         |               |   |    |                 |    |        |      |         |           |   |    |         |             |    |        |      |        |           |   |    |    |        |      |        |           |   |    |    |        |      |       |           |   |    |    |        |      |       |                              |    |   |    |        |      |       |               |   |    |    |        |      |       |                              |    |    |    |        |      |       |           |   |   |    |        |      |       |               |   |   |    |        |      |       |           |   |   |                |    |        |     |       |            |   |

|                           |    |         |      |         |                              |    |    |         |             |
|---------------------------|----|---------|------|---------|------------------------------|----|----|---------|-------------|
| ATPalph                   | ME | 60.577  | 6.12 | +103.32 | <i>Dube3a</i> <sup>15b</sup> | 10 | 7  | CG5670  | FBgn0002921 |
|                           | CE | 69.420  | 6.35 | +18.06  | HS>Dube3a                    | 3  | 6  |         |             |
|                           | ME | 60.028  | 6.1  | +17     | HS>Dube3a-C/A                | 8  | 5  |         |             |
|                           | CE | 91.060  | 6.53 | +2.62   | HS>Dube3a-C/A                | 2  | 8  |         |             |
|                           | CE | 33.120  | 6.14 | +2.35   | HS>Dube3a                    | 3  | 3  |         |             |
|                           | ME | 95.858  | 6.33 | -3      | HS>Dube3a                    | 7  | 1  |         |             |
|                           | CE | 93.860  | 6.15 | -5.56   | HS>Dube3a                    | 3  | 1  |         |             |
| Bellwether                | CE | 47.862  | 8.24 | +8.94   | HS>Dube3a-C/A                | 2  | 24 | CG3612  | FBgn0011211 |
|                           | ME | 53.412  | 8.01 | +5.63   | <i>Dube3a</i> <sup>15b</sup> | 9  | 29 |         |             |
|                           | ME | 52.414  | 8.24 | +5.35   | <i>Dube3a</i> <sup>15b</sup> | 9  | 31 |         |             |
|                           | ME | 52.538  | 7.36 | +2.26   | <i>Dube3a</i> <sup>15b</sup> | 10 | 23 |         |             |
|                           | ME | 52.538  | 7.26 | +2.26   | <i>Dube3a</i> <sup>15b</sup> | 10 | 19 |         |             |
|                           | ME | 54.332  | 8.38 | +2.15   | HS>Dube3a-C/A                | 8  | 34 |         |             |
| CG12140                   | CE | 68.300  | 6.22 | +27.67  | hUBE3a-77L                   | 1  | 10 | CG12140 | FBgn0033465 |
|                           | NE | 70.320  | 6.43 | +23.61  | HS>Dube3a                    | 6  | 11 |         |             |
|                           | ME | 67.300  | 6.33 | -10.78  | <i>Dube3a</i> <sup>15b</sup> | 10 | 3  |         |             |
|                           | ME | 67.269  | 6.33 | -53.92  | HS>Dube3a                    | 7  | 3  |         |             |
| CG3415 (Mfe2)             | ME | 62.057  | 6.97 | +9.88   | HS>Dube3a-C/A                | 8  | 18 | CG3415  | FBgn0030731 |
| CG3731                    | NE | 46.374  | 6.05 | +5.01   | <i>Dube3a</i> <sup>15b</sup> | 5  | 20 | CG3731  | FBgn0038271 |
|                           | NE | 46.374  | 6.07 | +3.27   | hUBE3a-77L                   | 5  | 18 |         |             |
| CG6045                    | CE | 40.170  | 6.23 | +5.76   | HS>Dube3a-C/A                | 2  | 3  | CG6045  | FBgn0038349 |
| CG7430                    | CE | 167.620 | 6.23 | +3256   | HS>Dube3a-C/A                | 2  | 1  | CG7430  | FBgn0036762 |
|                           | CE | 53.070  | 7.12 | +8.24   | HS>Dube3a                    | 3  | 14 |         |             |
|                           | CE | 51.590  | 6.76 | +5.33   | HS>Dube3a                    | 3  | 8  |         |             |
|                           | CE | 51.380  | 6.14 | +3.36   | HS>Dube3a                    | 3  | 2  |         |             |
| CG7461                    | ME | 63.310  | 7.79 | +21.33  | HS>Dube3a-C/A                | 8  | 27 | CG7461  | FBgn0034432 |
| CG7920                    | CE | 48.940  | 7.92 | +3.25   | HS>Dube3a                    | 3  | 27 | CG7920  | FBgn0039737 |
| Chaoptin                  | CE | 144.040 | 7.27 | +28.36  | HS>Dube3a-C/A                | 2  | 17 | CG1744  | FBgn0000313 |
|                           | ME | 175.419 | 7.6  | +8.38   | HS>Dube3a-C/A                | 8  | 25 |         |             |
|                           | NE | 166.721 | 7.27 | +5.16   | <i>Dube3a</i> <sup>15b</sup> | 4  | 1  |         |             |
|                           | NE | 157.000 | 6.91 | +3.2    | <i>Dube3a</i> <sup>15b</sup> | 5  | 28 |         |             |
| Crystallin                | ME | 58.770  | 7.29 | +33.52  | HS>Dube3a                    | 7  | 17 | CG16963 | FBgn0005664 |
|                           | NE | 70.856  | 5.46 | +7.71   | HS>Dube3a                    | 6  | 3  |         |             |
|                           | NE | 55.982  | 6.07 | +2.36   | hUBE3a-77L                   | 5  | 16 |         |             |
| Cuticular protein<br>72Ec | NE | 47.553  | 6.84 | +111.34 | hUBE3a-77L                   | 5  | 27 | CG4784  | FBgn0036619 |
|                           | NE | 43.555  | 6.51 | +94.95  | <i>Dube3a</i> <sup>15b</sup> | 5  | 22 |         |             |
|                           | NE | 44.382  | 5.81 | +31.37  | <i>Dube3a</i> <sup>15b</sup> | 5  | 9  |         |             |
|                           | NE | 43.147  | 6.05 | +18.77  | <i>Dube3a</i> <sup>15b</sup> | 5  | 21 |         |             |
|                           | NE | 47.852  | 6.07 | +15.21  | hUBE3a-77L                   | 5  | 17 |         |             |
|                           | NE | 43.578  | 7.89 | +8.62   | <i>Dube3a</i> <sup>15b</sup> | 4  | 7  |         |             |
|                           | NE | 50.000  | 5.58 | +3.87   | hUBE3a-77L                   | 5  | 6  |         |             |

|                                               |    |         |      |        |                              |    |    |         |             |
|-----------------------------------------------|----|---------|------|--------|------------------------------|----|----|---------|-------------|
|                                               | CE | 50.630  | 5.46 | +2.64  | hUBE3a-77L                   | 1  | 4  |         |             |
| Dynamin                                       | NE | 94.703  | 7.46 | +2.61  | <i>Dube3a</i> <sup>15b</sup> | 4  | 2  | CG18102 | FBgn0003392 |
| Enolase                                       | CE | 47.470  | 7.12 | +7.28  | HS>Dube3a                    | 3  | 15 | CG17654 | FBgn0000579 |
|                                               | CE | 21.560  | 6.53 | -2.6   | HS>Dube3a-C/A                | 2  | 7  |         |             |
|                                               | ME | 46.293  | 6.69 | -3.3   | <i>Dube3a</i> <sup>15b</sup> | 10 | 9  |         |             |
|                                               | ME | 47.502  | 6.69 | -3.68  | HS>Dube3a-C/A                | 8  | 9  |         |             |
|                                               | ME | 46.853  | 6.69 | -4.05  | Dube3a                       | 7  | 6  |         |             |
|                                               | ME | 45.970  | 7.26 | -10.59 | <i>Dube3a</i> <sup>15b</sup> | 10 | 20 |         |             |
|                                               | ME | 45.970  | 7.12 | -11.19 | <i>Dube3a</i> <sup>15b</sup> | 10 | 15 |         |             |
| Eps15                                         | CE | 96.770  | 5.46 |        |                              |    |    |         |             |
|                                               |    |         |      | +2.66  | hUBE3a-77L                   | 1  | 2  | CG16932 | FBgn0035060 |
| ERp60                                         | CE | 43.749  | 6.53 | +5.91  | Dube3a-C/A                   | 2  | 11 | CG8983  | FBgn0033663 |
| Failed Axon Connections                       | CE | 62.200  | 5.45 | +10.75 | <i>Dube3a</i> <sup>15b</sup> | 11 | 1  | CG4609  | FBgn0014163 |
| Fasciclin 1                                   | ME | 60.950  | 7.36 | +11    | <i>Dube3a</i> <sup>15b</sup> | 10 | 22 | CG6588  | FBgn0262742 |
| Fat-body protein 1                            | NE | 47.550  | 6.91 | +60.64 | <i>Dube3a</i> <sup>15b</sup> | 5  | 29 | CG17285 | FBgn0000639 |
| Fimbrin                                       | CE | 70.910  | 5.94 | +102.3 | <i>Dube3a</i> <sup>15b</sup> | 11 | 3  | CG8649  | FBgn0024238 |
| glyceraldehyde 3 p                            | CE | 35.610  | 8.45 | +2.64  | Dube3a-C/A                   | 2  | 28 | CG12055 | FBgn0001091 |
| Glycogen Phosphorylase                        | CE | 84.490  | 7.27 | +7.54  | Dube3a-C/A                   | 2  | 18 | CG7254  | FBgn0004507 |
| HSP 70Ab                                      | CE | 72.240  | 6.22 | +8.37  | hUBE3a-77L                   | 1  | 9  | CG18743 | FBgn0013276 |
| HSP 70Ba                                      | CE | 58.040  | 6.83 | +30.95 | Dube3a-C/A                   | 2  | 12 | CG31449 | FBgn0013277 |
|                                               | ME | 71.620  | 6.33 | -6.19  | HS>Dube3a                    | 7  | 2  |         |             |
|                                               | ME |         | 6.33 | -14.53 | <i>Dube3a</i> <sup>15b</sup> | 10 | 2  |         |             |
| HSP 70Bb                                      | CE | 56.330  | 6.53 | +3.72  | Dube3a-C/A                   | 2  | 10 | CG31359 | FBgn0013278 |
| HSP cognate 2                                 | CE | 63.910  | 6.23 | +5.46  | Dube3a-C/A                   | 2  | 2  | CG7756  | FBgn0001217 |
|                                               | CE | 73.240  | 6.35 | +4.69  | HS>Dube3a                    | 3  | 5  |         |             |
| HSP cognate 4                                 | CE | 35.610  | 7.27 | +26.04 | Dube3a-C/A                   | 2  | 21 | CG4264  | FBgn0001219 |
|                                               | CE | 71.800  | 5.46 | +2.35  | hUBE3a-77L                   | 1  | 3  |         |             |
| Malic Enzyme                                  | ME | 60.940  | 6.58 | +5.52  | HS>Dube3a                    | 7  | 9  | CG10120 | FBgn0002719 |
| Myosin Heavy Chain                            | NE | 71.666  | 6.02 | +13.35 | HS>Dube3a                    | 6  | 6  | CG17927 | FBgn0086783 |
|                                               | CE | 254.443 | 6.22 | +7.42  | hUBE3a-77L                   | 1  | 7  |         |             |
|                                               |    |         |      |        | <i>Dube3a</i> <sup>15b</sup> | 9  | 30 |         |             |
|                                               | ME |         | 8.24 | +7.34  |                              |    |    |         |             |
|                                               | NE | 41.181  | 6.02 | +4.27  | HS>Dube3a                    | 6  | 9  |         |             |
|                                               | NE | 250.000 | 6.07 | +3.5   | hUBE3a-77L                   | 5  | 13 |         |             |
|                                               | NE | 250.000 | 6.05 | +2.89  | <i>Dube3a</i> <sup>15b</sup> | 5  | 19 |         |             |
|                                               | NE | 238.130 | 5.85 | -5.25  | HS>Dube3a                    | 6  | 1  |         |             |
| NADH-ubiquinone oxidoreductase 75 kDa subunit | ME | 75.264  | 6.55 | +5.38  | <i>Dube3a</i> <sup>15b</sup> | 10 | 11 | CG2286  | FBgn0017566 |

|                                 |    |         |      |        |                              |    |    |         |             |
|---------------------------------|----|---------|------|--------|------------------------------|----|----|---------|-------------|
|                                 | ME | 77.254  | 6.33 | -6.66  | Dube3a-C/A                   | 8  | 2  |         |             |
| neither<br>inactivation nor     | CE | 134.820 | 6.22 | +10.91 | hUBE3a-77L                   | 1  | 8  | CG5125  | FBgn0002938 |
| Phosphoglycerate                |    |         |      |        |                              |    |    |         |             |
| Kinase                          | CE | 46.490  | 7.67 | +1.78  | HS>Dube3a                    | 3  | 23 | CG3127  | FBgn0250906 |
| Porin                           | CE | 23.670  | 7.2  | -5.6   | Dube3a-C/A                   | 2  | 16 | CG6647  | FBgn0004363 |
| Prolyl<br>endopeptidase         | CE | 86.410  | 5.94 | +16.76 | <i>Dube3a</i> <sup>15b</sup> | 11 | 2  | CG5355  | FBgn0032242 |
| Pro-phenol<br>Oxidase 1         | CE | 80.500  | 6.69 | 3.35   | Dube3a15b                    | 11 | 4  | CG42639 | FBgn0261382 |
|                                 | ME | 68.990  | 7.12 | -2.87  | <i>Dube3a</i> <sup>15b</sup> | 10 | 14 | CG42639 | FBgn0261362 |
| Protein disulfide-<br>isomerase | NE | 51.150  | 6.02 | +2.44  | HS>Dube3a                    | 6  | 8  | CG6988  | FBgn0014002 |
| Punch                           | ME | 32.270  | 6.33 | -9.39  | <i>Dube3a</i> <sup>15b</sup> | 10 | 5  | CG9441  | FBgn0003162 |
| Regucalcin                      | CE | 24.399  | 6.83 | +14.04 | Dube3a-C/A                   | 2  | 15 | CG1803  | FBgn0030362 |
| Transferrin 1                   | CE | 57.009  | 7.27 | +22.01 | Dube3a-C/A                   | 2  | 20 | CG6186  | FBgn0022355 |
|                                 | CE | 70.790  | 7.12 | +16.52 | HS>Dube3a                    | 3  | 13 |         |             |
| Tropomyosin I                   | NE | 36.750  | 5.58 | +2.2   | hUBE3a-77L                   | 5  | 8  | CG4898  | FBgn0003721 |
| Unidentified                    | NE | 41.900  | 7.46 | +2.29  | <i>Dube3a</i> <sup>15b</sup> | 4  | 4  |         |             |
