# Supplementary material for: Proteomic Profiling in Drosophila Reveals Potential Dube3a Regulation of the Actin Cytoskeleton and Neuronal Homeostasis
Source: PubMed Central journal article supplement (PMC3633955; doi:10.1371/journal.pone.0061952), 2013-04-23
Supplement: pone.0061952.s002.pdf [file pone.0061952.s002.pdf]

**Supplemental Table 2**

| <b>Gene</b>                                | <b><i>Dube3a</i><sup>15b</sup></b> | <b>HS&gt;Dube3a</b> | <b>HS&gt;Dube3a-C/A</b> |
|--------------------------------------------|------------------------------------|---------------------|-------------------------|
| Actin 57B                                  | 1.62 ± 0.08                        | -1.07 ± 0.07        | -1.22 ± 0.06            |
| Actin-5c                                   | -1.19 ± 0.13                       | 1.09 ± 0.01         | -1.27 ± 0.1             |
| Alcohol Dehydrogenase                      | -1.30 ± 0.07                       | -1.07 ± 0.07        | 1.27 ± 0.13             |
| Aldehyde Dehydrogenase                     | -1.38 ± 0.18                       | 1.52 ± 0.12         | 1.36 ± 0.11             |
| Aldolase                                   | -1.09 ± 0.06                       | -1.17 ± 0.10        | -1.39 ± 0.15            |
| Alpha-Tubulin                              | 1.08 ± 0.06                        | 1.12 ± 0.10         | 1.31 ± 0.04             |
| *Apolipophorins                            | 1.43 ± 0.08                        | 1.07 ± 0.01         | 2.20 ± 0.06             |
| Arginine Kinase set 1                      | -1.17 ± 0.03                       | -1.36 ± 0.07        | -1.40 ± 0.26            |
| Arginine Kinase set 2                      | -1.32 ± 0.08                       | -1.20 ± 0.06        | -1.28 ± 0.09            |
| ATP synthase-β                             | -1.75 ± 0.13                       | -1.43 ± 0.06        | -1.79 ± 0.05            |
| ATPα                                       | 1.07 ± 0.01                        | -1.30 ± 0.06        | -1.31 ± 0.24            |
| Bellwether                                 | -1.51 ± 0.06                       | -1.05 ± 0.02        | -1.53 ± 0.44            |
| CG12140                                    | -1.46 ± 0.03                       | -1.14 ± 0.05        | -1.21 ± 0.21            |
| CG3415 (Mfe2)                              | 1.10 ± 0.07                        | -1.12 ± 0.04        | -1.23 ± 0.06            |
| CG3731                                     | -1.60 ± 0.17                       | -1.14 ± 0.12        | -1.38 ± 0.07            |
| CG6045                                     | 1.44 ± 0.08                        | 1.27 ± 0.17         | -1.11 ± 0.05            |
| CG7430                                     | 1.38 ± 0.03                        | -1.05 ± 0.05        | -1.81 ± 0.36            |
| CG7461                                     | -1.33 ± 0.20                       | -1.11 ± 0.07        | -1.23 ± 0.14            |
| CG7920                                     |                                    | 2.54 ± 0.18         | 3.87 ± 0.11             |
| Chaoptin                                   | 1.23 ± 0.04                        | -1.09 ± 0.07        | -1.29 ± 0.16            |
| *Crystallin                                | -1.78 ± 0.33                       | 2.08 ± 0.20         | 2.20 ± 0.32             |
| Cuticular protein 72Ec                     | 1.59 ± 0.05                        | 2.50 ± 0.15         | 6.34 ± 0.47             |
| Dynamin                                    | 1.99 ± 0.06                        | 1.06 ± 0.05         | 1.49 ± 0.28             |
| Enolase                                    | -1.28 ± 0.10                       | -2.49 ± 0.31        | -2.79 ± 0.71            |
| *Eps15                                     | -1.33 ± 0.14                       | 1.27 ± 0.24         | 1.62 ± 0.54             |
| ERp60                                      | 1.11 ± 0.07                        | -1.61 ± 0.12        | -1.73 ± 0.08            |
| Failed Axon Connections                    | 2.75 ± 0.39                        | -1.28 ± 0.06        | 1.33 ± 0.31             |
| *Fasciclin 1                               | 1.39 ± 0.10                        | 1.88 ± 0.46         | 1.87 ± 0.13             |
| *Fat-body protein 1                        | -3.32 ± 0.46                       | 2.08 ± 0.93         | 1.76 ± 0.13             |
| Fimbrin                                    | 1.27 ± 0.11                        | 1.09 ± 0.03         | 1.13 ± 0.04             |
| *GAPDH                                     | 1.19 ± 0.14                        | 1.77 ± 0.31         | 1.87 ± 0.25             |
| Glycogen Phosphorylase                     | -2.32 ± 0.10                       | -2.74 ± 0.13        | -1.38 ± 0.07            |
| HSP 70Ab                                   | 25.23 ± 1.87                       | 2.90 ± 0.29         | 2.56 ± 0.22             |
| HSP 70Ba                                   | 27.50 ± 1.09                       | 2.99 ± 0.25         | 2.98 ± 0.26             |
| HSP 70Bb                                   | 60.63 ± 27.4                       | 2.58 ± 0.15         | 2.87 ± 0.65             |
| HSP cognate 2                              | 1.28 ± 0.15                        | 1.32 ± 0.09         | -1.36 ± 0.25            |
| HSP cognate 4                              | 2.67 ± 0.42                        | 1.17 ± 0.05         | -1.59 ± 0.16            |
| Malic Enzyme                               | -1.41 ± 0.10                       | 1.19 ± 0.02         | 1.14 ± 0.01             |
| Myosin Heavy Chain set 1                   | 5.34 ± 0.23                        | -1.43 ± 0.05        | -2.16 ± 0.40            |
| Myosin Heavy Chain set 2                   | -1.55 ± 0.04                       | 1.22 ± 0.09         | -1.64 ± 0.06            |
| NADH                                       | -1.06 ± 0.02                       | -2.28 ± 0.08        | -5.06 ± 0.94            |
| *neither inactivation nor afterpotential C | 1.05 ± 0.05                        | 2.05 ± 0.13         | 2.48 ± 0.25             |
| Phosphoglycerate Kinase                    | -1.37 ± 0.08                       | -1.72 ± 0.20        | 1.12 ± 0.11             |
| Porin                                      | -1.97 ± 0.26                       | -1.28 ± 0.23        | -1.20 ± 0.11            |
| Pro-phenol Oxidase 1                       |                                    |                     |                         |
| Prolyl endopeptidase                       | 1.33 ± 0.17                        | 1.36 ± 0.22         | 1.36 ± 0.17             |
| Protein disulfide-isomerase                | 2.39 ± 0.33                        | 1.30 ± 0.11         | 1.40 ± 0.06             |
| *Punch                                     | -1.51 ± 0.19                       | 2.03 ± 0.50         | 2.96 ± 0.60             |
| Regucalcin                                 | -1.04 ± 0.02                       | -1.66 ± 0.20        | -3.23 ± 0.27            |
| Transferrin 1                              | -1.19 ± 0.06                       | 1.24 ± 0.08         | 1.12 ± 0.09             |
| Tropomyosin I                              | -3.25 ± 0.49                       | -1.41 ± 0.04        | -1.89 ± 0.07            |
