# Supplementary material for: Proteomic Profiling in Drosophila Reveals Potential Dube3a Regulation of the Actin Cytoskeleton and Neuronal Homeostasis
Source: PubMed Central journal article supplement (PMC3633955; doi:10.1371/journal.pone.0061952), 2013-04-23
Supplement: pone.0061952.s003.pdf [file pone.0061952.s003.pdf]

# Supplemental Table 3

| Category          | Term                                                      | Count | %  | F <sub>E</sub> | P <sub>value</sub> | Benjamini |
|-------------------|-----------------------------------------------------------|-------|----|----------------|--------------------|-----------|
| <b>Cluster 1</b>  | <b>Enrichment Score: 4.1</b>                              |       |    |                |                    |           |
| SP_PIR_KEYWORDS   | ATP                                                       | 6     | 14 | 26.6           | 2.488E-06          | 1.31E-04  |
| SP_PIR_KEYWORDS   | nucleotide-binding                                        | 13    | 30 | 5.3            | 2.549E-06          | 8.92E-05  |
| GOTERM_MF_FAT     | GO:0000166~nucleotide binding                             | 19    | 44 | 3.1            | 4.379E-06          | 7.00E-04  |
| SP_PIR_KEYWORDS   | atp-binding                                               | 11    | 26 | 5.7            | 1.275E-05          | 3.35E-04  |
| GOTERM_MF_FAT     | GO:0017076~purine nucleotide binding                      | 16    | 37 | 3.2            | 3.434E-05          | 2.74E-03  |
| GOTERM_MF_FAT     | GO:0030554~adenyl nucleotide binding                      | 14    | 33 | 3.4            | 8.096E-05          | 4.31E-03  |
| GOTERM_MF_FAT     | GO:0001883~purine nucleoside binding                      | 14    | 33 | 3.4            | 8.630E-05          | 3.45E-03  |
| GOTERM_MF_FAT     | GO:0001882~nucleoside binding                             | 14    | 33 | 3.4            | 9.428E-05          | 3.01E-03  |
| GOTERM_MF_FAT     | GO:0032555~purine ribonucleotide binding                  | 13    | 30 | 2.8            | 1.142E-03          | 2.26E-02  |
| GOTERM_MF_FAT     | GO:0032553~ribonucleotide binding                         | 13    | 30 | 2.8            | 1.142E-03          | 2.26E-02  |
| GOTERM_MF_FAT     | GO:0005524~ATP binding                                    | 11    | 26 | 2.9            | 2.681E-03          | 4.66E-02  |
| GOTERM_MF_FAT     | GO:0032559~adenyl ribonucleotide binding                  | 11    | 26 | 2.9            | 2.734E-03          | 4.29E-02  |
| <b>Cluster 2</b>  | <b>Enrichment Score: 3.8</b>                              |       |    |                |                    |           |
| SP_PIR_KEYWORDS   | ATP                                                       | 6     | 14 | 26.6           | 2.488E-06          | 1.31E-04  |
| INTERPRO          | IPR018181:Heat shock protein 70, conserved site           | 4     | 9  | 80.9           | 1.295E-05          | 1.77E-03  |
| INTERPRO          | IPR013126:Heat shock protein 70                           | 4     | 9  | 74.7           | 1.679E-05          | 1.15E-03  |
| INTERPRO          | IPR001023:Heat shock protein Hsp70                        | 4     | 9  | 74.7           | 1.679E-05          | 1.15E-03  |
| SP_PIR_KEYWORDS   | stress response                                           | 4     | 9  | 52.5           | 5.333E-05          | 9.33E-04  |
| PIRSF_SUPERFAMILY | PIRSF002581:chaperone HSP70                               | 4     | 9  | 38.5           | 1.022E-04          | 2.55E-03  |
| SP_PIR_KEYWORDS   | molecular chaperone                                       | 3     | 7  | 129.4          | 2.125E-04          | 2.03E-03  |
| GOTERM_BP_FAT     | GO:0009266~response to temperature stimulus               | 5     | 12 | 13.6           | 4.247E-04          | 4.07E-02  |
| GOTERM_BP_FAT     | GO:0009628~response to abiotic stimulus                   | 6     | 14 | 5.6            | 3.710E-03          | 1.41E-01  |
| GOTERM_BP_FAT     | GO:0009408~response to heat                               | 4     | 9  | 11.7           | 4.410E-03          | 1.53E-01  |
| KEGG_PATHWAY      | dme04144:Endocytosis                                      | 5     | 12 | 6.1            | 6.423E-03          | 9.21E-02  |
| <b>Cluster 3</b>  | <b>Enrichment Score: 3.7</b>                              |       |    |                |                    |           |
| GOTERM_BP_FAT     | GO:0006091~generation of precursor metabolites and energy | 10    | 23 | 9.1            | 7.510E-07          | 3.67E-04  |
| KEGG_PATHWAY      | dme00010:Glycolysis / Gluconeogenesis                     | 7     | 16 | 13.2           | 5.805E-06          | 1.74E-04  |
| SP_PIR_KEYWORDS   | glycolysis                                                | 4     | 9  | 50.3           | 6.082E-05          | 9.12E-04  |
| GOTERM_BP_FAT     | GO:0044275~cellular carbohydrate catabolic process        | 5     | 12 | 19.5           | 1.054E-04          | 2.54E-02  |
| GOTERM_BP_FAT     | GO:0046164~alcohol catabolic process                      | 5     | 12 | 19.5           | 1.054E-04          | 2.54E-02  |
| GOTERM_BP_FAT     | GO:0006006~glucose metabolic process                      | 5     | 12 | 16.3           | 2.124E-04          | 2.56E-02  |
| SP_PIR_KEYWORDS   | gluconeogenesis                                           | 3     | 7  | 129.4          | 2.125E-04          | 2.03E-03  |
| UP_SEQ_FEATURE    | binding site:Substrate                                    | 5     | 12 | 12.4           | 5.004E-04          | 2.98E-02  |
| GOTERM_BP_FAT     | GO:0006096~glycolysis                                     | 4     | 9  | 22.7           | 6.440E-04          | 5.11E-02  |
| GOTERM_BP_FAT     | GO:0016052~carbohydrate catabolic process                 | 5     | 12 | 12.0           | 6.922E-04          | 4.72E-02  |
| GOTERM_BP_FAT     | GO:0019318~hexose metabolic process                       | 5     | 12 | 11.7           | 7.573E-04          | 4.53E-02  |
| GOTERM_BP_FAT     | GO:0006007~glucose catabolic process                      | 4     | 9  | 18.5           | 1.182E-03          | 6.22E-02  |
| GOTERM_BP_FAT     | GO:0019320~hexose catabolic process                       | 4     | 9  | 18.5           | 1.182E-03          | 6.22E-02  |
| GOTERM_BP_FAT     | GO:0005996~monosaccharide metabolic process               | 5     | 12 | 10.2           | 1.242E-03          | 5.90E-02  |
| GOTERM_BP_FAT     | GO:0046365~monosaccharide catabolic process               | 4     | 9  | 18.0           | 1.264E-03          | 5.47E-02  |
| <b>Cluster 4</b>  | <b>Enrichment Score: 3.3</b>                              |       |    |                |                    |           |
| SP_PIR_KEYWORDS   | oxidoreductase                                            | 12    | 28 | 6.5            | 1.125E-06          | 1.18E-04  |
| GOTERM_BP_FAT     | GO:0055114~oxidation reduction                            | 12    | 28 | 3.8            | 1.338E-04          | 2.16E-02  |
| GOTERM_MF_FAT     | GO:0048037~cofactor binding                               | 7     | 16 | 7.5            | 2.576E-04          | 6.85E-03  |
| GOTERM_MF_FAT     | GO:0050662~coenzyme binding                               | 6     | 14 | 8.5            | 5.262E-04          | 1.26E-02  |
| GOTERM_MF_FAT     | GO:0051287~NAD or NADH binding                            | 3     | 7  | 14.8           | 1.639E-02          | 1.98E-01  |
| GOTERM_MF_FAT     | GO:0050660~FAD binding                                    | 3     | 7  | 9.7            | 3.605E-02          | 3.07E-01  |
| <b>Cluster 5</b>  | <b>Enrichment Score: 2.9</b>                              |       |    |                |                    |           |
| SP_PIR_KEYWORDS   | cytoplasm                                                 | 9     | 21 | 6.2            | 6.569E-05          | 8.62E-04  |
| SP_PIR_KEYWORDS   | cytoskeleton                                              | 4     | 9  | 13.6           | 2.949E-03          | 2.19E-02  |
| GOTERM_CC_FAT     | GO:0015629~actin cytoskeleton                             | 4     | 9  | 8.1            | 1.115E-02          | 3.15E-01  |
| <b>Cluster 6</b>  | <b>Enrichment Score: 2.1</b>                              |       |    |                |                    |           |
| SP_PIR_KEYWORDS   | Redox-active center                                       | 3     | 7  | 60.4           | 1.045E-03          | 8.41E-03  |
| GOTERM_BP_FAT     | GO:0042592~homeostatic process                            | 5     | 12 | 6.1            | 8.060E-03          | 2.46E-01  |
| GOTERM_BP_FAT     | GO:0019725~cellular homeostasis                           | 4     | 9  | 7.2            | 1.689E-02          | 4.26E-01  |
| GOTERM_BP_FAT     | GO:0045454~cell redox homeostasis                         | 3     | 7  | 11.2           | 2.769E-02          | 4.97E-01  |
| <b>Cluster 7</b>  | <b>Enrichment Score: 1.8</b>                              |       |    |                |                    |           |
| SP_PIR_KEYWORDS   | actin-binding                                             | 3     | 7  | 19.7           | 9.668E-03          | 6.57E-02  |
| GOTERM_MF_FAT     | GO:0008092~cytoskeletal protein binding                   | 5     | 12 | 4.5            | 2.165E-02          | 2.36E-01  |
| GOTERM_MF_FAT     | GO:0003779~actin binding                                  | 4     | 9  | 6.5            | 2.180E-02          | 2.23E-01  |
| <b>Cluster 8</b>  | <b>Enrichment Score: 1.6</b>                              |       |    |                |                    |           |
| GOTERM_CC_FAT     | GO:0005739~mitochondrion                                  | 9     | 21 | 2.8            | 8.600E-03          | 3.53E-01  |
| GOTERM_CC_FAT     | GO:0044429~mitochondrial part                             | 7     | 16 | 3.0            | 2.025E-02          | 4.03E-01  |
| GOTERM_BP_FAT     | GO:0006119~oxidative phosphorylation                      | 4     | 9  | 6.0            | 2.658E-02          | 5.00E-01  |
| GOTERM_CC_FAT     | GO:0031966~mitochondrial membrane                         | 5     | 12 | 3.7            | 3.916E-02          | 5.54E-01  |
| GOTERM_CC_FAT     | GO:0005740~mitochondrial envelope                         | 5     | 12 | 3.4            | 4.839E-02          | 5.66E-01  |
